# Supplementary material for: Late Holocene slowdown of the Indian Ocean Walker circulation
Source: PubMed Central journal article supplement (PMC5715104; doi:10.1038/s41467-017-00855-3), 2017-10-18
Supplement: 41467_2017_855_MOESM1_ESM.pdf [file 41467_2017_855_MOESM1_ESM.pdf]

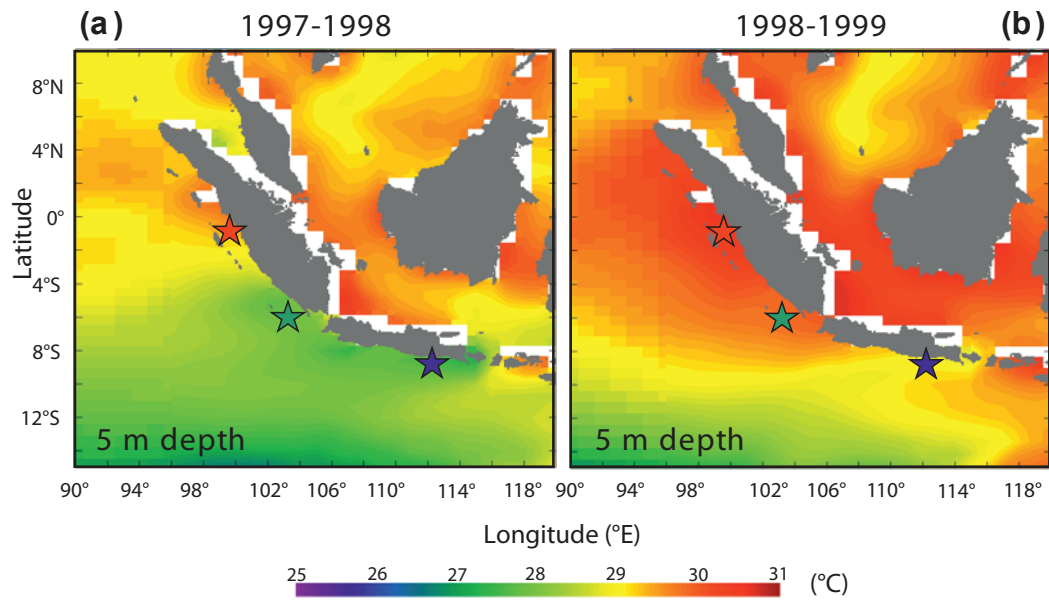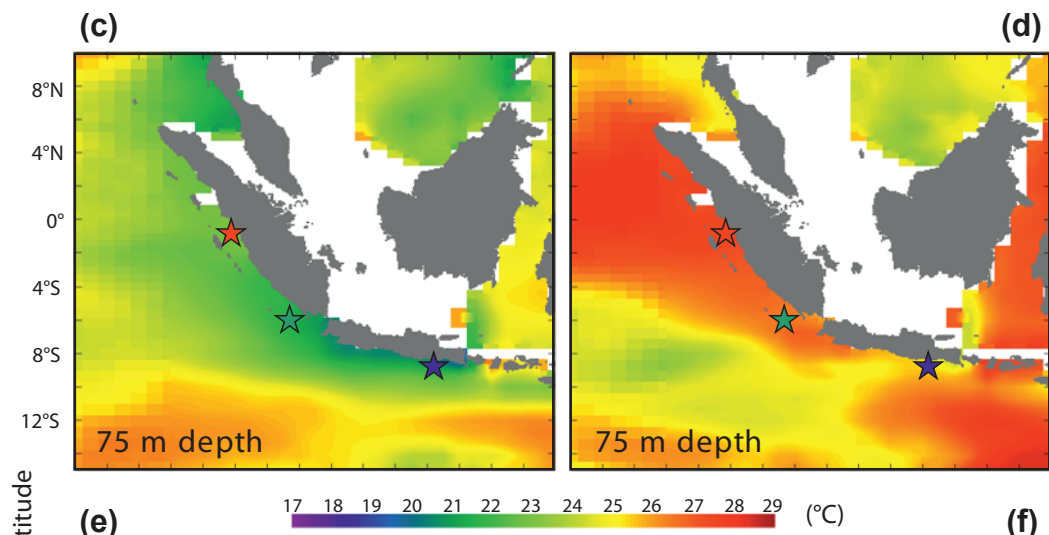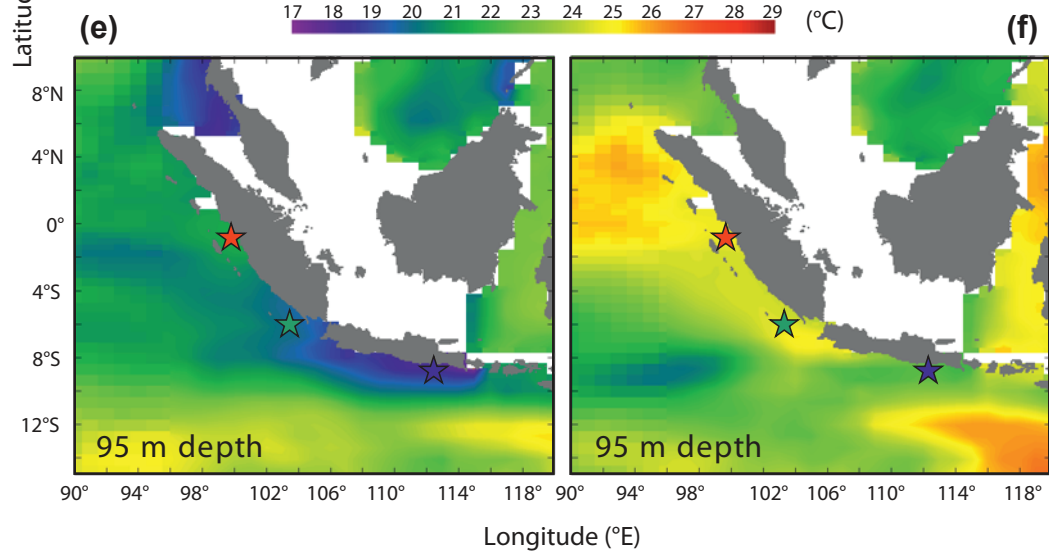

**Supplementary Figure 1. Modern changes in mean annual surface and thermocline temperatures of the eastern tropical Indian Ocean.** Potential temperature at **(a, b)** 5 m water depth, **(c, d)** 75 m water depth, and **(e, f)** at 95 m water depth during a positive Indian Ocean Dipole - El Niño year from March 16, 1997 to March 16, 1998 **(a, c, e)** and a La Niña year from March 16, 1998 to March 16, 1999 **(b, d, f)**. Note the different scale for **(a, b)**. Data from <http://data1.gfdl.noaa.gov>. Stars indicate the position of the records presented in this study (red: 39KL, green: GeoB 10038-4, blue: GeoB 10053-7). Note the observed warming in a strong Walker circulation scenario (right) compared to a weak Walker circulation scenario (left).

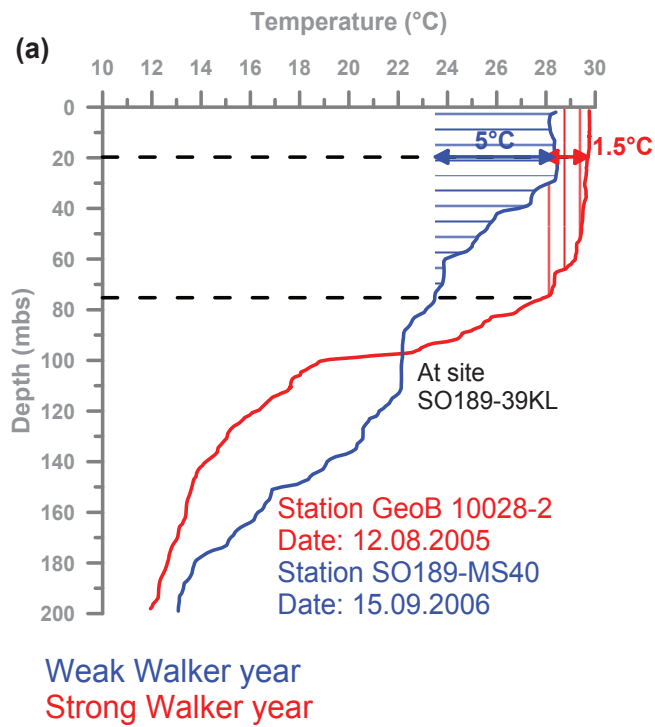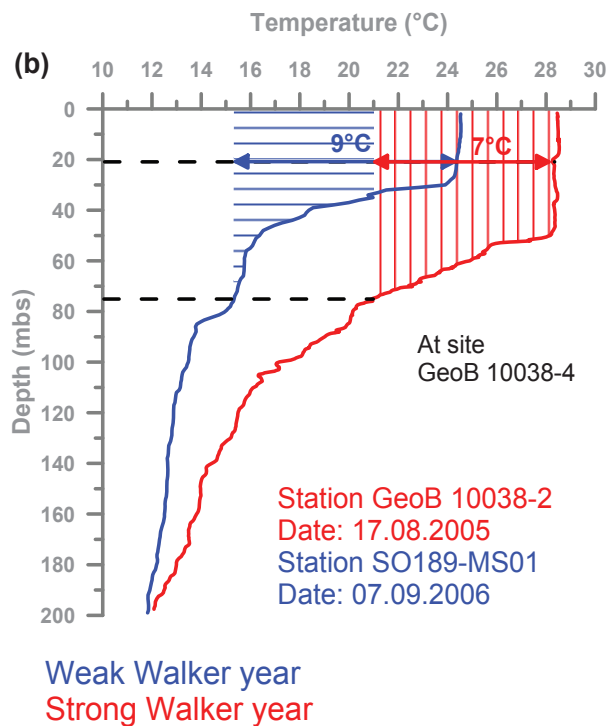

**Supplementary Figure 2. Response of the water column structure in the eastern tropical Indian Ocean to changes in Walker circulation.** CTD data from a strong Walker circulation year (2005, red) and a weak Walker circulation year (2006, blue) at sites (a) SO189-39KL and (b) GeoB 10038-4. Note the deeper and warmer thermocline during the strong Walker year. Double-headed arrows and coloured strips show the temperature difference ( $\Delta T$ ) between 20 m and 75 m water depth indicated by dashed lines. Note the smaller  $\Delta T$  during the strong Walker year.

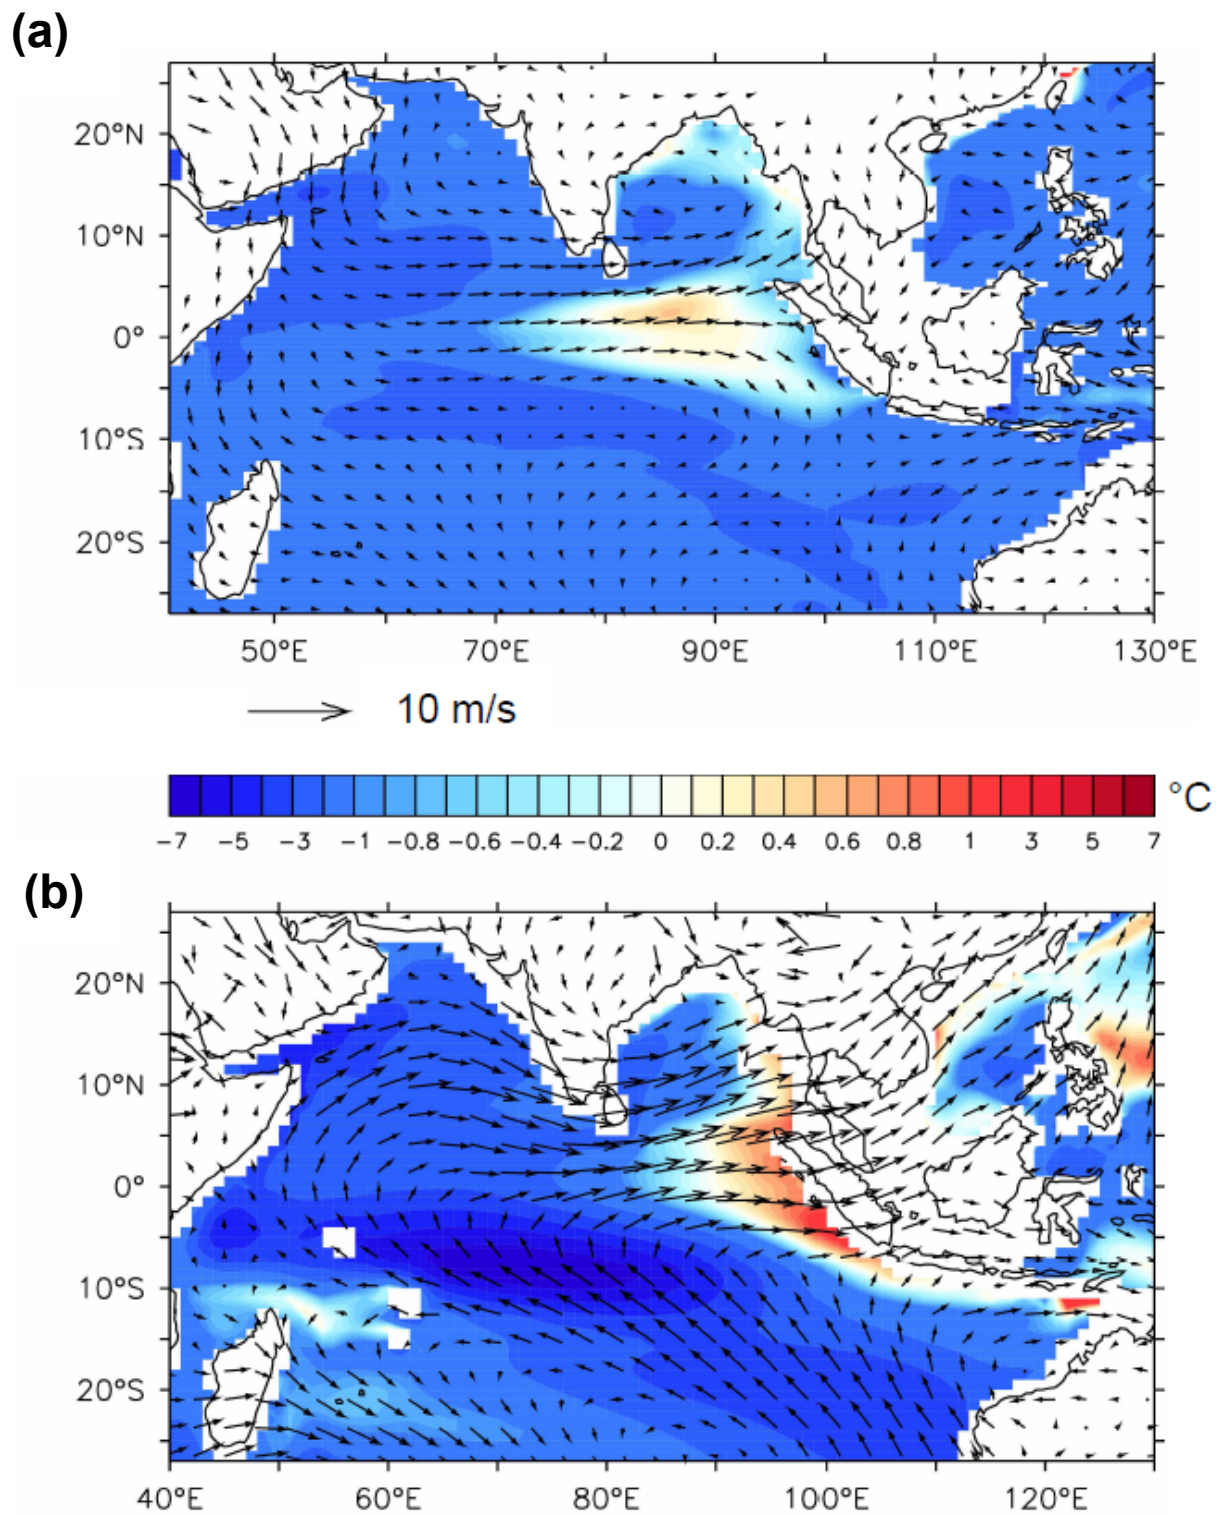

**Supplementary Figure 3. LGM ocean subsurface warming in CCSM3 and FGOALS-g1.0.** Shown are LGM anomalies (annual mean) relative to pre-industrial control runs for the 70 m temperature for **(a)** CCSM3 and **(b)** FGOALS-g1.0. Low-level wind anomalies and coastlines as in Fig. 5.

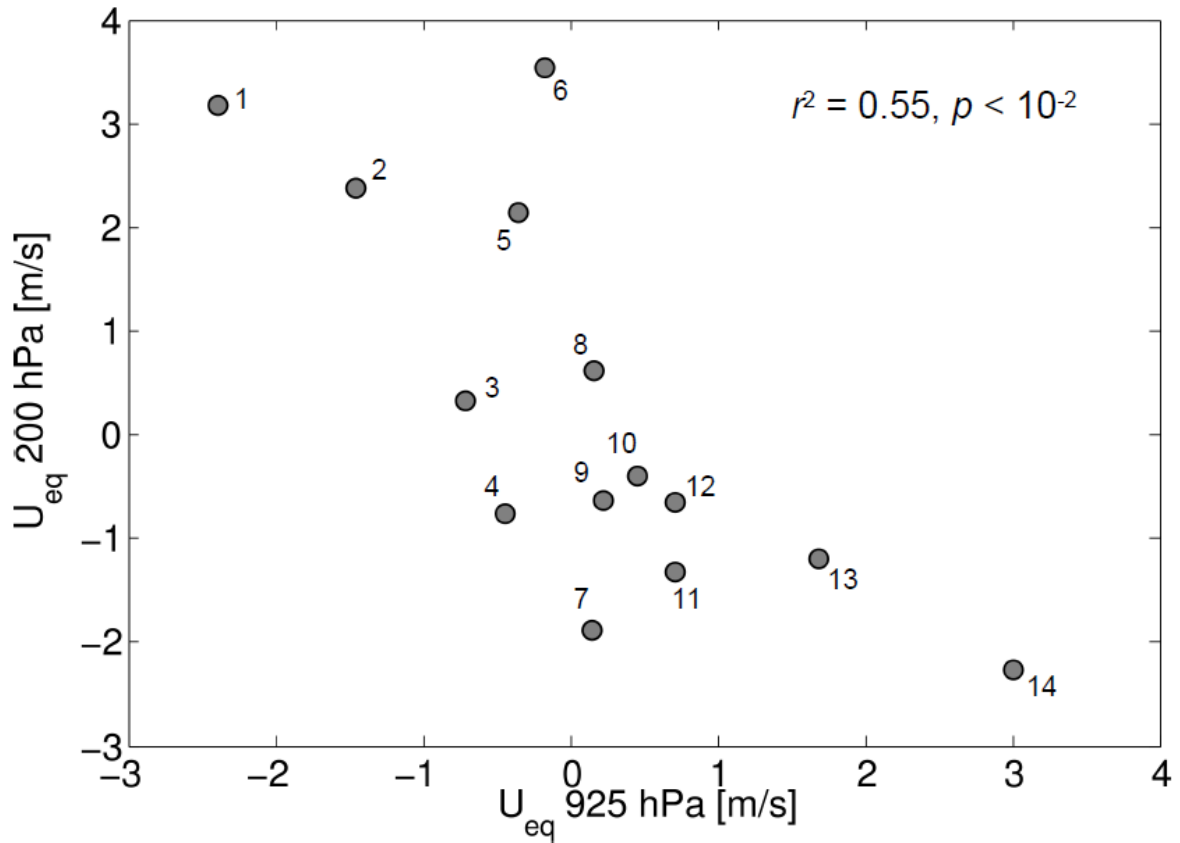

**Supplementary Figure 4. Upper-tropospheric (200 hPa) zonal wind anomalies versus low-level (925 hPa) zonal wind anomalies over the equatorial Indian Ocean as simulated in PMIP2 and PMIP3/CMIP5 models.** Zonal wind anomalies,  $U_{eq}$ , are defined as the annual mean zonal wind averaged over  $5^{\circ}\text{N}$ - $5^{\circ}\text{S}$ ,  $50^{\circ}\text{E}$ - $100^{\circ}\text{E}$  (see Fig. 5), LGM relative to pre-industrial. The models are numbered as in Supplementary Table 2.

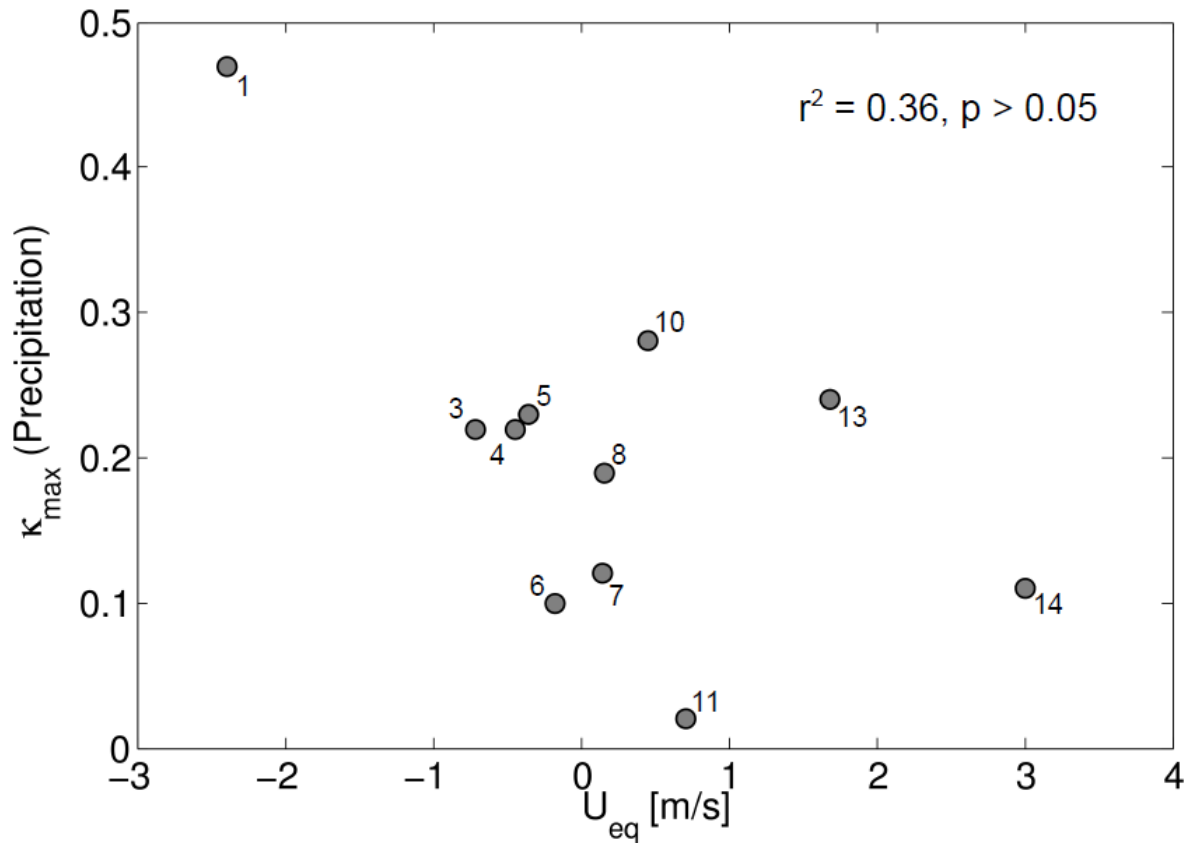

**Supplementary Figure 5. Maximum Cohen's  $\kappa$  versus equatorial Indian Ocean zonal wind anomaly as simulated in PMIP models.**  $U_{eq}$  is defined as the LGM anomaly (relative to pre-industrial) of the annual mean zonal low-level (925 hPa) wind averaged over 5°N-5°S, 50°E-100°E (see Fig. 5). Maximum Cohen's  $\kappa$  has been used to quantify model-data agreement with respect to precipitation proxies in the Indo-Pacific region, for the calculation of Cohen's  $\kappa$  see<sup>1</sup>. The models are numbered as in Supplementary Table 2. Three models (No. 2, 9, and 12) were not included in (ref<sup>1</sup>), hence no  $\kappa$  values are available.

| Core/Species              | # Samples | # Replicates | 1 $\sigma$ Standard Deviation (mmol mol <sup>-1</sup> ) |            |            |
|---------------------------|-----------|--------------|---------------------------------------------------------|------------|------------|
|                           |           |              | Ext. standard                                           | ECRM 752-1 | Replicates |
| <b>SO189-39KL</b>         |           |              |                                                         |            |            |
| <i>G. ruber</i>           | 671       | 55           | 0.005                                                   | 0.006      | 0.12       |
| <i>P. obliquiloculata</i> | 651       | 50           | 0.004                                                   | 0.003      | 0.10       |
| <b>GeoB 10038-4</b>       |           |              |                                                         |            |            |
| <i>G. ruber</i>           | 184       | 39           | 0.09                                                    | 0.009      | 0.09       |
| <i>P. obliquiloculata</i> | 60        | 26           | 0.09                                                    | 0.009      | 0.22       |
| <i>N. dutertrei</i>       | 248       | 94           | 0.09                                                    | 0.009      | 0.25       |
| <i>G. tumida</i>          | 62        | 25           | 0.09                                                    | 0.009      | 0.11       |
| <b>GeoB 10053-7</b>       |           |              |                                                         |            |            |
| <i>G. ruber</i>           | 291       | 30           | 0.01                                                    | 0.01       | 0.19       |
| <i>P. obliquiloculata</i> | 271       | 30           | 0.02                                                    | 0.01       | 0.21       |

**Supplementary Table 1. Amount and relative standard deviation of Mg/Ca measurements at different sites.** Standard deviations (1 $\sigma$ ) for external standard and ECRM 752-1 are calculated by considering all measurements during a analytical campaign as indicated in the column “# Samples”. Standard deviation for replicates refers to measurements on additional samples that have been separately cleaned and measured (column “# Replicates”), and then compared to their corresponding samples from the original run (column # Samples).

| No. | Model        | Institution                                                                   | Grid resolution                              | PMIP phase |
|-----|--------------|-------------------------------------------------------------------------------|----------------------------------------------|------------|
| 1   | HadCM3       | UK Met Office Hadley Centre, UK                                               | Atm: 96 x 72 x L19<br>Ocn: 288 x 144 x L20   | 2          |
| 2   | FGOALS-g2.0  | LASG/Institute of Atmospheric Physics, China                                  | Atm: 128 x 60 x L26<br>Ocn: 360 x 180 x L30  | 3          |
| 3   | IPSL-CM4     | Institut Pierre Simon Laplace, France                                         | Atm: 96 x 72 x L19<br>Ocn: 182 x 149 x L31   | 2          |
| 4   | CNRM-CM5     | Centre National de Recherches Meteorologiques, France                         | Atm: 256 x 128 x L31<br>Ocn: 362 x 292 x L42 | 3          |
| 5   | GISS-E2-R    | NASA Goddard Institute for Space Studies, USA                                 | Atm: 144 x 90 x L40<br>Ocn: 288 x 180 x L32  | 3          |
| 6   | IPSL-CM5A    | Institut Pierre Simon Laplace, France                                         | Atm: 96 x 96 x L39<br>Ocn: 182 x 149 x L31   | 3          |
| 7   | MRI-CGCM3    | Meteorological Research Institute, Japan                                      | Atm: 320 x 160 x L48<br>Ocn: 364 x 368 x L51 | 3          |
| 8   | MIROC3.2     | Center for Climate System Research (University of Tokyo), JAMSTEC, Japan      | Atm: 128 x 64 x L20<br>Ocn: 256 x 192 x L43  | 2          |
| 9   | ECHAM5-MPIOM | Max Planck Institute for Meteorology, Germany                                 | Atm: 96 x 48 x L19<br>Ocn: 120 x 101 x L40   | 2          |
| 10  | MPI-ESM      | Max Planck Institute for Meteorology, Germany                                 | Atm: 196 x 98 x L47<br>Ocn: 256 x 220 x L40  | 3          |
| 11  | CCSM4        | National Center for Atmospheric Research, USA                                 | Atm: 288 x 192 x L26<br>Ocn: 320 x 384 x L60 | 3          |
| 12  | MIROC-ESM    | JAMSTEC, University of Tokyo, National Inst. for Environmental Studies, Japan | Atm: 128 x 64 x L80<br>Ocn: 256 x 192 x L44  | 3          |
| 13  | CCSM3        | National Center for Atmospheric Research, USA                                 | Atm: 128 x 64 x L26<br>Ocn: 320 x 384 x L40  | 2          |
| 14  | FGOALS-g1.0  | LASG/Institute of Atmospheric Physics, China                                  | Atm: 128 x 60 x L26<br>Ocn: 360 x 180 x L33  | 2          |

**Supplementary Table 2. PMIP2 and PMIP3/CMIP5 models providing LGM and pre-industrial simulations used in this study.** In the column for grid resolution the following abbreviations are used: Atm (atmospheric grid resolution), Ocn (ocean grid resolution), L (number of levels in the vertical). The numbering (first column) is related to the simulated magnitude of LGM zonal wind anomalies over the equatorial Indian Ocean and used in Fig. 4 and Supplementary Figs. 4-5. For further references regarding the climate models the reader is referred to <https://pmip2.lsce.ipsl.fr> and <https://pmip3.lsce.ipsl.fr>.



## Supplementary references

- 1 DiNezio, P. N. & Tierney, J. E. The effect of sea level on glacial Indo-Pacific climate. *Nature Geoscience* **6**, 485-491, doi:10.1038/ngeo1823 (2013).
