# Supplementary material for: Late Holocene slowdown of the Indian Ocean Walker circulation
Source: PubMed Central journal article supplement (PMC5715104; doi:10.1038/s41467-017-00855-3), 2017-10-18
Supplement: 41467_2017_855_MOESM3_ESM.pdf [file 41467_2017_855_MOESM3_ESM.pdf]

## Description of Additional Supplementary Files

File Name: Supplementary Data 1

Description: Hydroclimate proxy data from the eastern tropical Indian Ocean. This file contains Mg/Ca-based SST and thermocline temperatures with  $1\sigma$  error at different sites, their difference ( $\Delta T$ ), and the average  $\Delta T$  values for different periods with 95% confidence interval (CI). Also shown are hydrogen isotope ( $\delta D$ ) values of n-C<sub>31</sub> alkanes relative to the standard mean ocean water (‰ SMOW) with the 95% CI (LGM values are corrected for ice-volume), the C<sub>31</sub> n-alkane concentrations in nanogram per gram sediment ( $\text{ng g}^{-1}$ ), the Carbon Preference Index (CPI<sub>27-33</sub>) as a measure of the degree of terrestrial organic matter degradation (higher CPI reflects less degraded plant waxes and vice versa), and their  $1\sigma$  standard deviations (SD).
